# Supplementary material for: Sulfur nanoparticles in situ growth on TiO2 mesoporous single crystals with enhanced solar light photocatalytic performance
Source: Royal Society of Chemistry journal article supplement (doi:10.1039/c6ra17884g), 2016-01-01
Supplement: c6ra17884g1.pdf [file c6ra17884g1.pdf]

*Supporting Information*

***Sulfur nanoparticles in situ growth on TiO<sub>2</sub> mesoporous  
single crystals with enhanced solar light photocatalytic  
performance***

Chencheng Dong,<sup>a</sup> Hui Song,<sup>a</sup> Yi Zhou,<sup>a</sup> Chunyang Dong,<sup>a</sup> Bin Shen,<sup>a</sup> Hua Yang,<sup>b\*</sup> Masaya

Matsuoka,<sup>c</sup> Mingyang Xing,<sup>a\*</sup> Jinlong Zhang<sup>a\*</sup>

<sup>a.</sup> *Key Laboratory for Advanced Materials and Institute of Fine Chemicals,  
School of Chemistry & Molecular Engineering, East China University of Science  
and Technology, 130 Meilong Road, Shanghai 200237, P. R. China. E-mail  
address: mingyangxing@ecust.edu.cn; jlzhang@ecust.edu.cn*

<sup>b.</sup> *Department of Radiology, Chongqing Traditional Chinese Medicine Hospital,  
Chongqing 400021, China. E-mail address: yanghua780819@163.com*

<sup>c.</sup> *Department of Applied Chemistry, Graduate School of Engineering, Osaka  
Prefecture University, Osaka 599-8531, Japan*

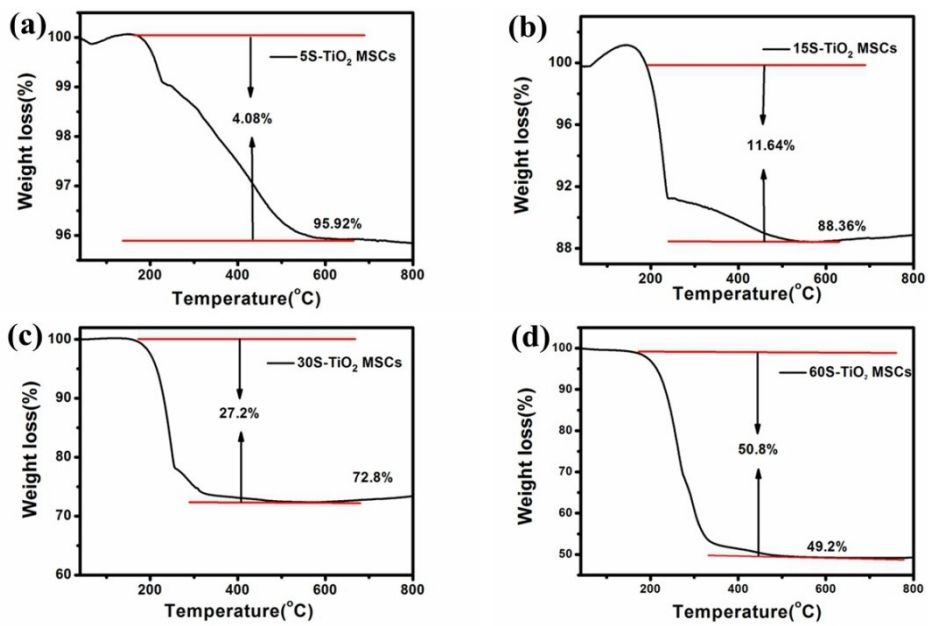

Fig. S1 TG spectra of different sulfur nanoparticles loaded TiO<sub>2</sub> MSCs.

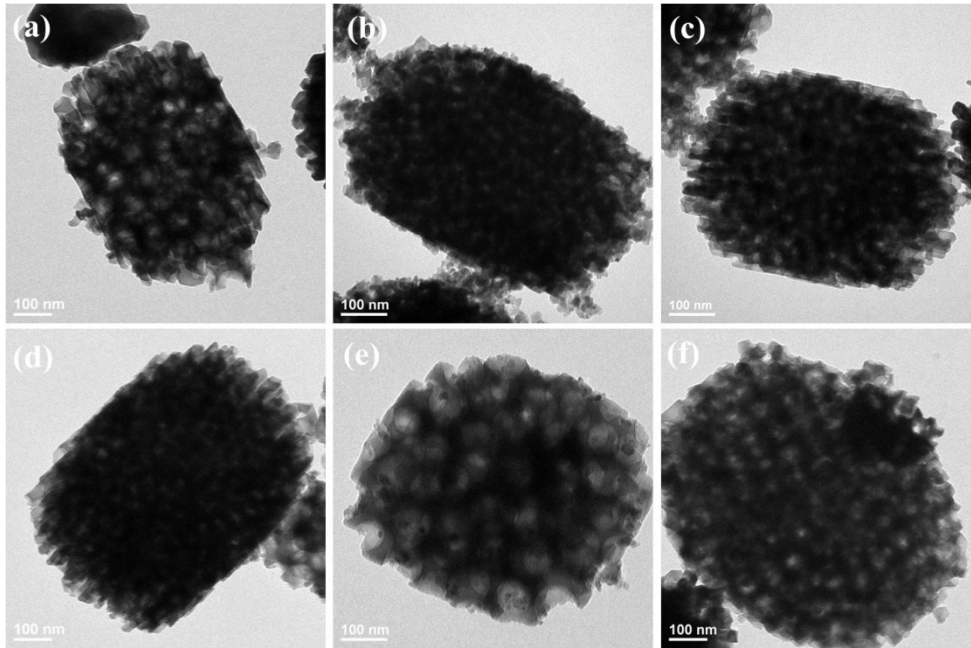

Fig. S2 TEM images of P-TiO<sub>2</sub> MSCs(a); 5S-TiO<sub>2</sub> MSCs(b); 15S-TiO<sub>2</sub> MSCs(c); 30S-TiO<sub>2</sub> MSCs(d); 60S-TiO<sub>2</sub> MSCs(e); 90S-TiO<sub>2</sub> MSCs(f).

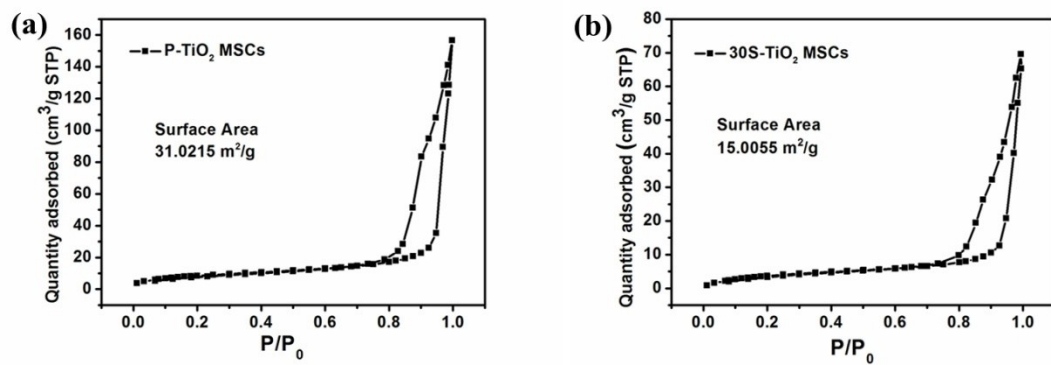

Fig. S3 Nitrogen adsorption-desorption isotherms of P-TiO<sub>2</sub> MSCs (a) and 30S-TiO<sub>2</sub> MSCs (b).

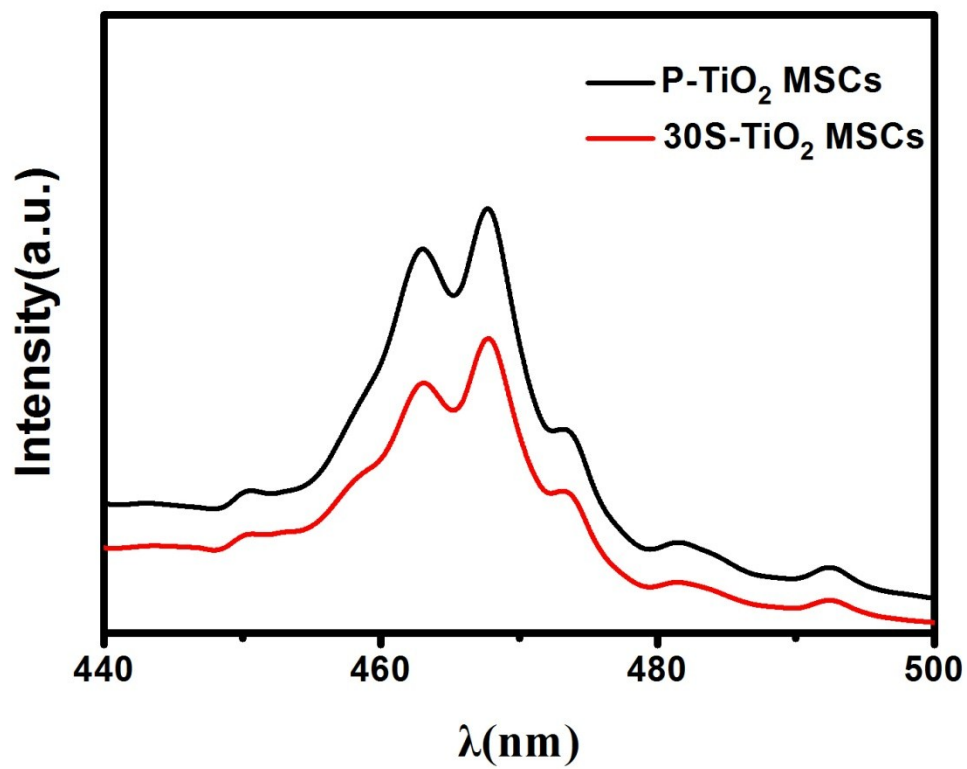

Fig. S4 PL spectra of different powder photo-catalysts (excitation wavelength: 320 nm)

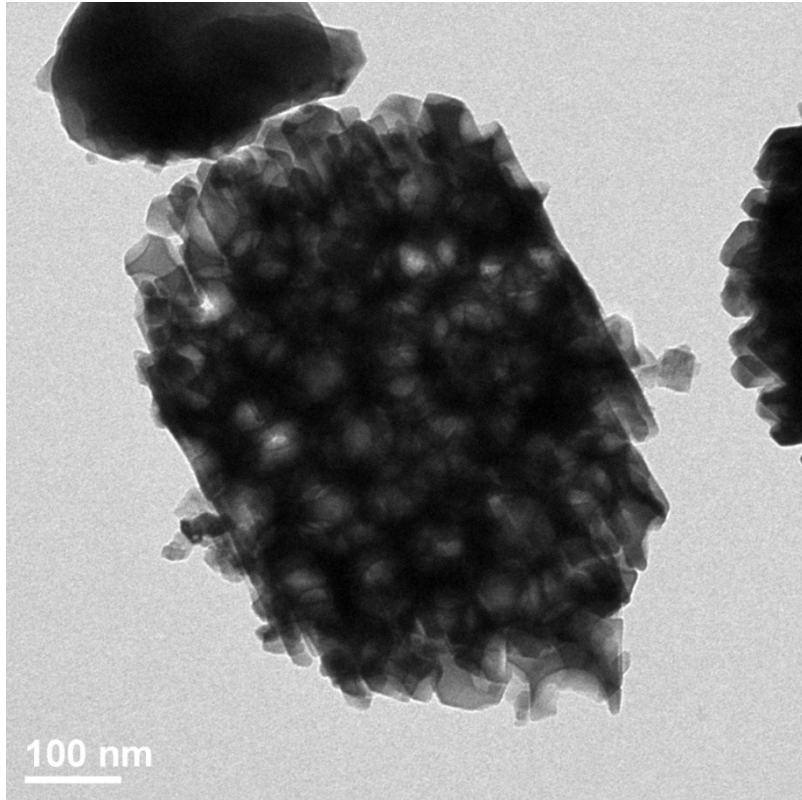

Fig. S5 the TEM image of 30S-TiO<sub>2</sub> MSCs after cycling test.

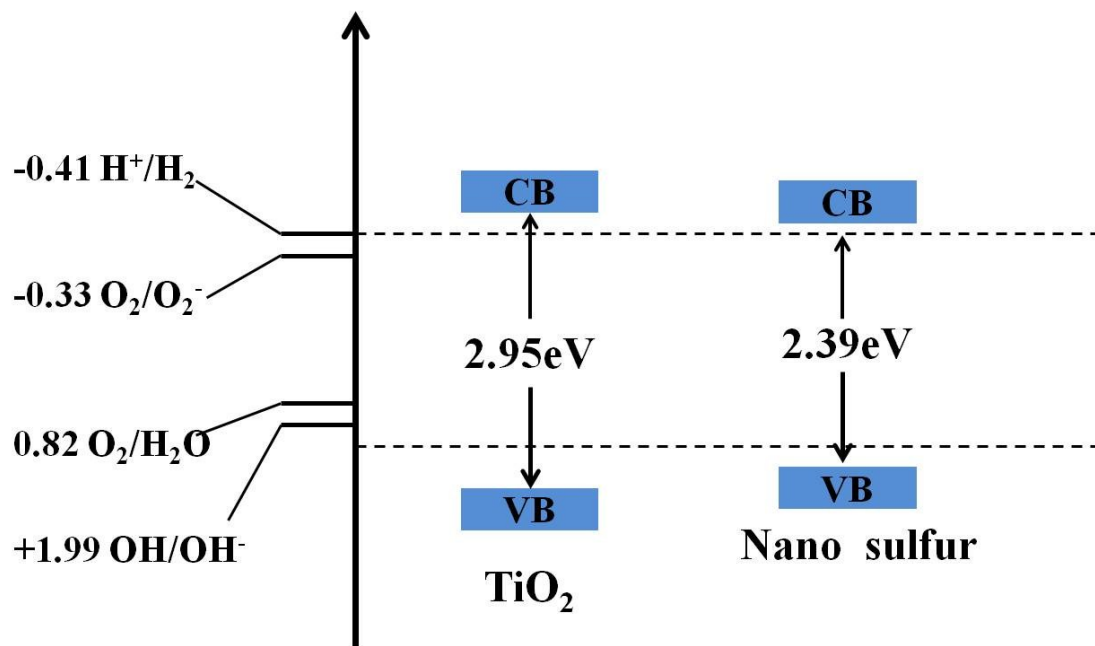

Fig. S6 Potential diagram for P-TiO<sub>2</sub> MSCs and Nano sulfur.
